# Supplementary material for: PFI-3 induces vasorelaxation with potency to reduce extracellular calcium influx in rat mesenteric artery
Source: PeerJ journal article supplement (doi:10.7717/peerj.15407), 2023-05-25
Supplement: ARRIVe.docx [file ARRIVe.docx]

| Table 1 ARRIVE Essential 10 | |
| --- | --- |
| ARRIVE Essential 10 | |
| Study design | a. The groups being compared, including control groups. If no control group has been used, the rationale should be stated.  Figure Legends, line 445, 448, 456, 460, 469, 472-474, 481, 487, 492, 493, 502, 507, 513, 520-521, 530-531;  b. The experimental unit.  Materials and methods (Animals and Mesenteric Artery Tension Measurement), line 142-147. |
| Sample size | a. Specify the exact number of experimental units allocated to each group, and the total number in each experiment. Also indicate the total number of animals used.  Materials and methods (Animals and Mesenteric Artery Tension Measurement), line 142-147, Figure Legends, line 444, 448-450, 456, 460-462, 469, 472-474, 481, 485-487, 492, 494-496, 502, 505-507, 513-515, 521-523.  b. Explain how the sample size was decided. Provide details of any a priori sample size calculation, if done.  Materials and methods (Animals and Mesenteric Artery Tension Measurement), line 142-147. |
| Inclusion and  exclusion criteria | a. Describe any criteria used for including and excluding animals (or experimental units) during the experiment, and data points during the analysis. Specify if these criteria were established a priori. If no criteria were set, state this explicitly.  Materials and methods (Animals and Mesenteric Artery Tension Measurement), line 129-130.  b. For each experimental group, report any animals, experimental units or data points not included in the analysis and explain why. If there were no exclusions, state so.  c. For each analysis, report the exact value of n in each experimental group. Figure Legends, line 444, 448-450, 456, 460-462, 469, 472-474, 481, 485-487, 492, 494-496, 502, 505-507, 513-515, 521-523. |
| Randomisation | a. State whether randomisation was used to allocate experimental units to control and treatment groups. If done, provide the method used to generate the randomisation sequence.  b. Describe the strategy used to minimise potential confounders such as the order of treatments and measurements, or animal/cage location. If confounders were not controlled, state this explicitly.  Materials and methods (Animals and Mesenteric Artery Tension Measurement), line142-147. |
| Blinding | Describe who was aware of the group allocation at the different stages of the experiment (during the allocation, the conduct of the experiment, the outcome assessment, and the data analysis).  Author contributions, line356-357. |
| Outcome measures | a. Clearly define all outcome measures assessed (e.g. cell death, molecular markers, or behavioural changes).  Results, line171-175.  b. For hypothesis-testing studies, specify the primary outcome measure, i.e. the outcome measure that was used to determine the sample size.  Results, line173-178. |
| Statistical methods | a. Provide details of the statistical methods used for each analysis, including software used.  b. Describe any methods used to assess whether the data met the assumptions of the statistical approach, and what was done if the assumptions were not met. Statistical analysis, line 160-166; Figure Legends, line 448-450, 460-462, 43-474, 485-487, 494-496, 505-507, 513-515, 521-523. |
| Experimental animals | a. Provide species-appropriate details of the animals used, including species, strain and substrain, sex, age or developmental stage, and, if relevant, weight.  b. Provide further relevant information on the provenance of animals, health/immune status, genetic modification status, genotype, and any previous procedures.  Materials and methods (Animals and Mesenteric Artery Tension Measurement), line 122-123. |
| Experimental  procedures | For each experimental group, including controls, describe the procedures in enough detail to allow others to replicate them, including:  a. What was done, how it was done and what was used.  b. When and how often.  c. Where (including detail of any acclimatisation periods).  d. Why (provide rationale for procedures).  Figure Legends, line 440-532. |
| Results | For each experiment conducted, including independent replications, report:  a. Summary/descriptive statistics for each experimental group, with a measure of variability  where applicable (e. g. mean and SD, or median and range).  b. If applicable, the effect size with a confidence interval.  Results, line 169-261. |

| Table 2 ARRIVE Recommended Set | |
| --- | --- |
| Recommended Set | |
| Abstract | Provide an accurate summary of the research objectives, animal species, strain and sex, key methods, principal findings, and study conclusions.  Abstract, line 29-51. |
| Background | a. Include sufficient scientific background to understand the rationale and context for the study, and explain the experimental approach.  b. Explain how the animal species and model used address the scientific objectives and, where appropriate, the relevance to human biology.  Abstract, line 29-41; Discussion, line 274-279. |
| Objectives | Clearly describe the research question, research objectives and, where appropriate, specific hypotheses being tested.  Introduction, line 94-97. |
| Ethical statement | Provide the name of the ethical review committee or equivalent that has approved the use of animals in this study, and any relevant licence or protocol numbers (if applicable). If ethical approval was not sought or granted, provide a justification.  Materials and methods (Animals and Mesenteric Artery Tension Measurement), line 125-128. |
| Housing and husbandry | Provide details of housing and husbandry conditions, including any environmental enrichment.  Materials and methods (Animals and Mesenteric Artery Tension Measurement), line 121-125. |
| Animal care and  monitoring | a. Describe any interventions or steps taken in the experimental protocols to reduce pain, suffering and distress.  b. Report any expected or unexpected adverse events.  c. Describe the humane endpoints established for the study, the signs that were monitored and the frequency of monitoring. If the study did not have humane endpoints, state this.  Materials and methods (Animals and Mesenteric Artery Tension Measurement), line 128-130. |
| Interpretation/Scientific  implications | a. Interpret the results, taking into account the study objectives and hypotheses, current theory and other relevant studies in the literature.  b. Comment on the study limitations including potential sources of bias, limitations of the animal model, and imprecision associated with the results.  Discussion, line 274-345. |
| Generalisability/  Translation | Comment on whether, and how, the findings of this study are likely to generalise to other species or experimental conditions, including any relevance to human biology (where appropriate).  Discussion, line 274-345. |
| Protocol registration | Provide a statement indicating whether a protocol (including the research question, key design features, and analysis plan) was prepared before the study, and if and where this protocol was registered.  Materials and methods, line 101-147. |
| Data access | Provide a statement describing if and where study data are available.  Competing Interest statement. |
| Declaration of interests | a. Declare any potential conflicts of interest, including financial and non-financial. If none exist, this should be stated.  b. List all funding sources (including grant identifier) and the role of the funder(s) in the design, analysis and reporting of the study.  Funding statement. |
