# Supplementary material for: PFI-3 induces vasorelaxation with potency to reduce extracellular calcium influx in rat mesenteric artery
Source: PeerJ journal article supplement (doi:10.7717/peerj.15407), 2023-05-25
Supplement: TableS1.xlsx [file TableS1.xlsx]

## Sheet: Sheet1
	Figure2	Ctl	PFI-3 0.25μM	PFI-3 0.5μM	PFI-3 1μM	PFI-3 2μM	PFI-3 4μM	PFI-3 5μM
	Cell viability（%）	1.14763	1.15957	1.16232	1.14212	1.03195	1.11274	0.952075
		0.950239	1.02369	1.01634	0.971355	0.90617	0.740911	0.877708
		1.23301	1.10081	1.12192	1.01726	1.0751	1.00165	1.02277
		0.743665	0.744583	0.7556	0.762027	0.828131	0.792325	0.769372
		0.92545	0.991553	0.936467	0.896071	0.837312	0.762945	0.80426
