# Supplementary material for: PFI-3 induces vasorelaxation with potency to reduce extracellular calcium influx in rat mesenteric artery
Source: PeerJ journal article supplement (doi:10.7717/peerj.15407), 2023-05-25
Supplement: TableS2.xlsx [file TableS2.xlsx]

## Sheet: Figure1
	Figure3B
	endothelium-intact rat mesenteric arteries										n=8
			DMSO	DMSO	DMSO	DMSO	PFI-3	PFI-3	PFI-3	PFI-3
			0.25μM	0.5μM	1μM	2μM	0.25μM	0.5μM	1μM	2μM
		percentage（%）	5.8653	6.34102	7.27271	15.2308	11.7199	23.6852	38.9264	75.9735
			14.8078	8.82532	2.64567	14.3219	24.8715	39.5038	47.2246	94.7991
			10.3493	7.92133	12.242	9.13225	25.9585	34.874	50.8658	86.6163
			14.9273	6.82158	16.2133	7.93276	22.8834	35.2613	68.6165	70.6106
			9.12964	0	8.51236	6.07717	13.3267	25.1875	55.0222	85.2032
			5.15092	3.75955	1.02837	6.42727	15.4748	24.909	37.2783	59.5715
			0.214713	0	4.98623	18.9886	9.42393	18.328	42.8248	98.3334
			3.36658	0	1.43762	23.1363	13.3025	18.0194	38.2786	98.2507
	Figure3D
	endothelium-denuded rat mesenteric arteries										n=8
			DMSO	DMSO	DMSO	DMSO	PFI-3	PFI-3	PFI-3	PFI-3
			0.25μM	0.5μM	1μM	2μM	0.25μM	0.5μM	1μM	2μM
		percentage（%）	0.201279	1.91724	4.73982	4.94727	10.0846	16.8744	32.2728	57.4848
			0	4.03756	4.54741	0	8.82045	17.8577	26.8986	43.1071
			3.72868	2.52401	3.82559	1.77989	9.52644	19.2133	24.2617	36.8703
			2.29759	0	4.47011	0	12.5936	17.9784	24.4992	33.9109
			0	0.546038	0	3.88489	9.66554	11.7579	19.2401	31.0804
			2.29425	3.22698	5.48152	4.87472	11.6276	13.3329	20.4368	32.0646
			1.83429	0	3.36038	4.76605	13.4755	11.3427	18.8222	23.0243
			3.74859	7.51793	2.46046	3.45025	11.6887	21.1019	18.3136	31.6066
