# Supplementary material for: PFI-3 induces vasorelaxation with potency to reduce extracellular calcium influx in rat mesenteric artery
Source: PeerJ journal article supplement (doi:10.7717/peerj.15407), 2023-05-25
Supplement: TableS3.xlsx [file TableS3.xlsx]

## Sheet: Figure2
Figure4B
endothelium-intact rat mesenteric arteries										n=8
		DMSO	DMSO	DMSO	DMSO	PFI-3	PFI-3	PFI-3	PFI-3
		0.25μM	0.5μM	1μM	2μM	0.25μM	0.5μM	1μM	2μM
	percentage（%）	0.20403	3.74712	5.17392	2.75503	7.74167	14.9422	18.6909	23.9917
		3.03478	3.76703	10.1645	7.94098	7.39964	14.6707	24.5894	22.4433
		0	4.01369	10.1607	2.89483	5.72848	15.2224	23.1213	24.719
		4.22131	5.53284	3.9758	4.01035	14.8363	18.509	13.1833	23.5811
		4.59297	4.44851	10.2941	4.39398	10.8255	17.6992	24.1881	19.322
		6.33316	3.47359	5.3784	2.40548	10.0074	14.3664	20.8229	20.0344
		2.62983	2.1898	6.21554	5.83414	14.4354	14.3603	21.3976	25.127
		5.54786	6.3292	3.72847	0	14.5084	18.8287	16.7189	26.09
Figure4D
endothelium-denuded rat mesenteric arteries										n=8
		DMSO	DMSO	DMSO	DMSO	PFI-3	PFI-3	PFI-3	PFI-3
		0.25μM	0.5μM	1μM	2μM	0.25μM	0.5μM	1μM	2μM
	percentage（%）	0.898141	6.85	2.84837	3.26016	9.87308	16.7337	13.7255	14.5542
		0.265532	1.27387	1.96667	1.18733	6.99716	10.3581	14.4144	13.4649
		0	0	5.30978	4.05769	6.96787	8.32667	11.4993	21.9807
		3.91402	4.75353	2.00591	10.0042	11.9949	8.81201	9.66242	19.5883
		0	1.87135	5.01525	0	1.65552	9.60504	11.3941	23.963
		0	0	0	0	4.90721	4.55737	8.34345	9.50186
		0	0	0	0.390636	4.60672	6.09009	11.7652	9.87756
		0	0.040016	2.08932	5.20508	1.30449	6.31463	8.14844	21.1796
