# Supplementary material for: PFI-3 induces vasorelaxation with potency to reduce extracellular calcium influx in rat mesenteric artery
Source: PeerJ journal article supplement (doi:10.7717/peerj.15407), 2023-05-25
Supplement: TableS4.xlsx [file TableS4.xlsx]

## Sheet: Figure3
Figure5B
endothelium-intact rat mesenteric arteries
		PFI-3	PFI-3	PFI-3	PFI-3	n=8
	DMSO	0.5μM	1μM	2μM	4μM
percentage（%）	4.12854	8.09453	14.8304	41.2938	99.1951
	1.09383	8.46405	14.3892	27.8867	88.2447
	1.01126	6.18808	12.201	57.061	99.2733
	3.45826	6.38831	16.6717	38.5603	96.0018
	4.59927	7.20567	12.7025	29.1248	95.6725
	4.17361	6.62939	12.3115	35.8182	81.1711
	0	5.84154	13.3946	20.9967	77.4466
	4.41294	6.72755	11.1596	19.68	95.9801
Figure5D
endothelium-denuded rat mesenteric arteries
		PFI-3	PFI-3	PFI-3	PFI-3	n=8
	DMSO	0.5μM	1μM	2μM	4μM
percentage（%）	0.253599	5.03892	10.3152	16.568	24.9901
	0	4.23795	11.7611	14.4906	20.4954
	0	7.0538	11.5987	15.2919	32.9578
	0	4.1627	12.9236	14.6035	32.1799
	2.44001	6.46286	10.4624	14.9762	33.8544
	0.146366	7.51569	13.1512	19.0185	22.6279
	0	5.61736	13.0036	16.4799	24.0921
	1.42411	5.62927	9.37893	16.1467	41.2202
