# Supplementary material for: PFI-3 induces vasorelaxation with potency to reduce extracellular calcium influx in rat mesenteric artery
Source: PeerJ journal article supplement (doi:10.7717/peerj.15407), 2023-05-25
Supplement: TableS5.xlsx [file TableS5.xlsx]

## Sheet: Figure4
Figure6B
endothelium-intact rat mesenteric arteries
		PFI-3	PFI-3	PFI-3	PFI-3	n=8
	DMSO	0.5μM	1μM	2μM	4μM
percentage（%）	0	3.27608	1.74438	4.95456	19.5739
	0	3.51533	4.82939	6.3978	9.80888
	0.154634	3.14624	6.16372	7.03826	9.73306
	1.72101	0.0704155	2.50197	7.56185	11.5241
	0	0.85235	3.43165	4.90426	11.4176
	0	3.12133	4.15165	4.85412	20.9144
	0	3.72544	4.89579	6.90674	20.7324
	0	0	4.98574	7.31197	11.5141
Figure6D
endothelium-denuded rat mesenteric arteries
		PFI-3	PFI-3	PFI-3	PFI-3	n=8
	DMSO	0.5μM	1μM	2μM	4μM
percentage（%）	0.441022	1.65703	6.73129	11.9707	15.7718
	1.23724	1.08922	6.88232	11.439	10.3044
	0	2.57006	3.43174	9.37235	12.5276
	2.42134	0	5.62255	12.497	13.0371
	1.95419	0.644957	6.7238	9.38902	14.2223
	0	3.42514	7.61581	10.5531	14.4917
	0	0.39801	5.27908	9.54262	14.7389
	0	2.27775	8.36682	9.9458	12.7793
