# Supplementary material for: PFI-3 induces vasorelaxation with potency to reduce extracellular calcium influx in rat mesenteric artery
Source: PeerJ journal article supplement (doi:10.7717/peerj.15407), 2023-05-25
Supplement: TableS6.xlsx [file TableS6.xlsx]

## Sheet: Sheet1
endothelium-intact rat mesenteric arteries-ODQ20UM
				Before incubation				following incubation
	PE	PFI3	Vasodilatation rate	percentage（%）	PE	PFI3	Vasodilatation rate	percentage（%）
	15.6656	0.4	0.974466	97.4466	15.535	0.3594	0.976865	97.6865
	18.1687	0.225	0.987616	98.7616	17.8969	0.575	0.967872	96.7872
	14.5844	0.7781	0.946648	94.6648	14.3656	0.4813	0.966496	96.6496
	24.8625	1.2656	0.949096	94.9096	23.8594	0.7406	0.96896	96.896
	12.4188	0.2188	0.982382	98.2382	11.2281	0.0688	0.993873	99.3873
	11.7625	0.2438	0.979273	97.9273	11.2438	0.05	0.995553	99.5553
	12.8219	0.3219	0.974895	97.4895	11.4906	0.0406	0.996467	99.6467
	18.0281	0.6469	0.964117	96.4117	17.1875	0.2906	0.983092	98.3092
endothelium-intact rat mesenteric arteries-Lname100UM
				Before incubation	following incubation
	PE	PFI3	Vasodilatation rate	percentage（%）	PE	PFI3	Vasodilatation rate	percentage（%）
	16.9719	0.2719	0.983979	98.3979	16.4656	0.4156	0.974759	97.4759
	15.3938	0.375	0.97564	97.564	14.8875	0.375	0.974811	97.4811
	18.7656	0.0781	0.995838	99.5838	16.35	0.3188	0.980502	98.0502
	14.3563	1.5281	0.893559	89.3559	13.6344	0.7875	0.942242	94.2242
	10.6469	0.2063	0.980623	98.0623	10.8563	0.15	0.986183	98.6183
	25.4063	1.3656	0.94625	94.625	24.3719	1.0063	0.958711	95.8711
	12.2625	0.3719	0.969672	96.9672	12.275	0.4969	0.959519	95.9519
	10.5813	0.1781	0.983168	98.3168	11.1438	0.2469	0.977844	97.7844
	12.2438	0.1969	0.983918	98.3918	12.25	0.2	0.983673	98.3673
	17.9406	0.2844	0.984148	98.4148	17.4156	0.5781	0.966806	96.6806

## Sheet: Sheet2
Figure7A
endothelium-intact rat mesenteric arteries-ODQ20μM
				PFI-3	PFI-3+ODQ20μM
				Before incubation	following incubation
				percentage（%）	percentage（%）
				97.4466	97.6865		n=8
				98.7616	96.7872
				94.6648	96.6496
				94.9096	96.896
				98.2382	99.3873
				97.9273	99.5553
				97.4895	99.6467
				96.4117	98.3092
Figure7B
endothelium-intact rat mesenteric arteries-L-NAME100μM
				PFI-3	PFI-3+L-NAME100μM
				percentage（%）	percentage（%）
				98.3979	97.4759		n=8
				97.564	97.4811
				99.5838	98.0502
				89.3559	94.2242
				98.0623	98.6183
				94.625	95.8711
				96.9672	95.9519
				98.3168	97.7844
				98.3918	98.3673
				98.4148	96.6806
