# Supplementary material for: PFI-3 induces vasorelaxation with potency to reduce extracellular calcium influx in rat mesenteric artery
Source: PeerJ journal article supplement (doi:10.7717/peerj.15407), 2023-05-25
Supplement: TableS7.xlsx [file TableS7.xlsx]

## Sheet: Sheet1
Figure8A
endothelium-intact rat mesenteric arteries-TEA
				PFI-3	PFI-3+TEA
				percentage（%）	percentage（%）
				97.6025	96.4656		n=8
				98.7616	96.7871
				97.9893	95.901
				95.4864	94.2678
				83.217	92.1644
				95.6256	95.6394
				95.2521	94.5592
				89.3284	93.5588
Figure8B
endothelium-intact rat mesenteric arteries-Gli
				PFI-3	PFI-3+Gli
				percentage（%）	percentage（%）
				97.672	97.6625		n=8
				81.8458	98.022
				90.631	98.5275
				94.2584	97.2732
				96.2181	97.9054
				98.9901	98.7081
				98.1113	92.5872
				87.7164	89.042
				98.3918	98.3673
				98.4148	96.6806
