# Supplementary material for: PFI-3 induces vasorelaxation with potency to reduce extracellular calcium influx in rat mesenteric artery
Source: PeerJ journal article supplement (doi:10.7717/peerj.15407), 2023-05-25
Supplement: TableS8.xlsx [file TableS8.xlsx]

## Sheet: Sheet1
Figure9A	endothelium-denuded rat mesenteric arteries
	Ctl			PFI-3
lg [Ca2+] M	-3.5	-3	-2.5	-3.5	-3	-2.5
	0.232639	0.698438	1	0.0763889	0.269097	0.484375		n=5
	0.240209	0.748042	1	0.078329	0.272846	0.464752
	0.280072	0.682226	1	0.10772	0.29623	0.423698
	0.388837	0.740767	1	0.0708479	0.262485	0.508711
	0.165333	0.645333	1	0.118667	0.193333	0.274667
Figure9B	endothelium-denuded rat mesenteric arteries
	Ctl			PFI-3
lg [Ca2+] M	-3.5	-3	-2.5	-3.5	-3	-2.5
	0.687292	0.915754	1	0.013803	0.0180866	0.0180866		n=5
	0.798046	1	0.905654	0	0	0
	0.672391	1	0.936592	0.0528402	0.0713342	0.0435931
	0.793694	1	0.934994	0.0447645	0.0420397	0.0447645
	0.857047	1	0.961991	0.00605449	0.00773629	0
