# Supplementary material for: PFI-3 induces vasorelaxation with potency to reduce extracellular calcium influx in rat mesenteric artery
Source: PeerJ journal article supplement (doi:10.7717/peerj.15407), 2023-05-25
Supplement: TableS9.xlsx [file TableS9.xlsx]

## Sheet: Sheet1
Figure10
	TG	TG+PFI-3
	0.978892	0.937984
	0.971831	0.987179
	0.986231	0.998534
	0.976978	0.968326
	0.983539	0.907834
