# Supplementary material for: PFI-3 induces vasorelaxation with potency to reduce extracellular calcium influx in rat mesenteric artery
Source: PeerJ journal article supplement (doi:10.7717/peerj.15407), 2023-05-25
Supplement: TableS10.xlsx [file TableS10.xlsx]

## Sheet: Sheet1
Figure10B
Time (min)	CaCl2																														Control
0	1.01033	1.01027	1.00258	1.00078	1.01112	1.00572	1.00661	1.00566	1.00775	1.00675	1.00424	0.988833	1.00117	1.0096	1.00638	1.00685	0.981492	1.00637	0.998702	0.995817	0.988006	1.00704	1.00146	1.01207	1.01094	1.01592	0.991805	0.993083	1.00471	0.999333	1.01434	1.02255	1.01299	1.00481	1.01828	0.999133	1.00391	0.998406	1.00667	1.00625	1.00124	1.00433	1.00703	1.00692	0.995675	1.00608	1.00444	1.01073	0.999464
1.5	1.23486	1.26168	1.17579	1.28466	1.11298	1.18315	1.29499	1.2157	1.26373	1.26092	1.34332	1.14564	1.13869	1.10651	1.17614	1.3101	1.43612	1.33954	1.3172	1.42934	1.29914	1.28093	1.2599	1.3393	1.17274	1.25588	1.25259	1.19477	1.15866	1.23849	0.980602	0.965345	0.962026	1.00221	0.959148	0.98155	0.991656	0.994098	0.997442	0.971287	0.998814	0.978372	0.976197	0.970448	0.974838	0.982909	0.996538	0.977644	0.994882
3	1.37743	1.53	1.40749	1.52564	1.25611	1.36833	1.47212	1.37189	1.46408	1.47232	1.56415	1.32764	1.41663	1.53818	1.61389	1.57762	1.60574	1.42348	1.42108	1.55441	1.47732	1.56041	1.37247	1.59054	1.50742	1.55633	1.29056	1.28872	1.30519	1.37295	0.989229	0.939112	1.01559	1.06943	1.01376	0.952439	0.950565	0.963436	1.06073	0.955589	0.992941	0.959484	0.953535	0.95435	0.952677	0.969814	0.993352	0.956273	0.981661
4.5	1.67207	1.80303	1.6961	1.89505	1.50788	1.7084	1.61128	1.45174	1.40095	1.57783	1.58966	1.35244	1.6349	1.76298	1.54723	1.52566	1.69091	1.39092	1.43675	1.51516	1.6142	1.53967	1.43881	1.63334	1.53537	1.57478	1.31274	1.36406	1.39061	1.38962	0.963842	0.936251	0.988672	1.02777	0.988958	0.976173	0.957449	1.03446	1.02496	1.03008	0.956059	0.903026	0.910624	0.904183	0.898573	0.919491	0.939799	0.895554	0.918987
[truncated: 71 more columns]
