# Supplementary material for: PFI-3 induces vasorelaxation with potency to reduce extracellular calcium influx in rat mesenteric artery
Source: PeerJ journal article supplement (doi:10.7717/peerj.15407), 2023-05-25
Supplement: TableS11.xlsx [file TableS11.xlsx]

## Sheet: Sheet1
Figure12B
	mV	Ctl (PA/PF)					PFI-3 (PA/PF)
	-40	-0.760063	-0.195864	-1.61781	-0.00332667	-0.797794	-0.124259	-3.59626	-0.0270777	-4.20922	0.256234
	-35	-1.03968	-0.195864	-1.81881	-0.0495304	-0.64347	-0.0335678	-3.90687	-0.0892887	-4.29261	-0.309654
	-30	-1.28431	-0.195864	-1.75181	-0.141938	-0.720632	-0.426563	-4.45044	-0.511565	-4.43629	-1.44143
	-25	-1.52894	-0.597789	-2.0868	-0.696383	-0.797794	-0.94048	-5.07166	-1.09626	-4.61012	-2.41153
	-20	-1.65125	-0.82746	-2.0198	-1.99009	-0.952118	-1.99854	-6.08115	-2.20067	-4.65441	-3.94751
	-15	-1.95704	-0.82746	-2.2208	-3.28379	-1.02928	-2.60315	-6.85768	-2.94777	-7.79462	-3.30078
	-10	-2.32398	-0.770042	-2.35479	-3.88444	-1.72374	-3.75191	-7.63421	-4.24709	-9.08256	-2.81573
	-5	-2.81324	-1.2868	-2.75678	-3.79203	-2.64968	-5.65642	-8.6437	-6.42343	-11.3659	-3.46246
	0	-3.54713	-2.66483	-3.29276	-3.65342	-3.65279	-8.13531	-9.03196	-8.89212	-12.1163	-4.43256
	5	-4.03639	-4.44478	-3.89574	-4.48509	-4.27008	-9.94914	-8.95431	-10.7436	-12.0329	-5.8877
	10	-5.01491	-6.05248	-4.63272	-5.7788	-4.88738	-12.2769	-8.87665	-13.2448	-11.4493	-7.42369
	15	-5.56533	-7.02859	-5.4367	-6.88769	-4.65589	-12.8513	-8.02247	-13.862	-10.949	-8.79799
	20	-5.80996	-7.086	-5.90568	-7.44213	-4.65589	-13.3652	-7.55656	-14.4142	-9.19796	-10.4148
	25	-6.23806	-6.33957	-5.90568	-6.84148	-4.19292	-12.4583	-6.93533	-13.4397	-8.11401	-11.1424
	30	-6.48269	-5.01896	-5.16871	-6.05602	-3.65279	-11.3397	-6.39176	-12.2379	-6.44638	-10.8999
	35	-6.42153	-3.5261	-4.36473	-4.99333	-2.95833	-10.1003	-5.77054	-10.9061	-5.0289	-10.4957
	40	-5.68764	-1.68873	-3.49376	-3.74583	-2.26387	-8.49808	-4.99401	-9.21695	-3.86156	-9.84892
	45	-4.4645	-0.248413	-2.75678	-2.31351	-1.72374	-6.89587	-4.37279	-7.46288	-2.7776	-9.04051
	50	-3.48598	-0.115387	-2.0868	-0.973605	-1.02928	-4.41697	-3.75157	-4.96171	-1.77702	-8.15126
	55	-2.50746	-0.0940663	-1.28282	-0.907811	-0.411983	-2.78453	-3.3633	-3.17515	-1.19335	-7.42369
	60	-1.65125	-0.093614	-0.0098621	-0.753528	-0.0261734	-2.08923	-3.28565	-2.3306	-0.276159	-6.8578
